# Supplementary material for: Cross-Platform Comparison of Amino Acid Metabolic Profiling in Three Model Organisms Used in Environmental Metabolomics
Source: MDPI journal article supplement (doi:10.3390/metabo13030402), 2023-03-08
Supplement: s1 [file s1]

## **-Supplementary Materials-**

### **Cross-platform comparison of amino acid metabolic profiling in three model organisms used in environmental metabolomics**

Jessica C. D'eon<sup>1a</sup>, Brian P. Lankadurai<sup>1a</sup>, André J. Simpson<sup>1</sup>, Eric J. Reiner<sup>2</sup>, David G. Poirier<sup>2</sup>, Greg C. Vanlerberghe<sup>3</sup>, and Myrna J. Simpson<sup>1\*</sup>

<sup>1</sup>Department of Chemistry, University of Toronto, 80 St. George Street, Toronto, ON, M5S 3H6.  
Environmental NMR Centre and Department of Physical and Environmental Sciences,  
University of Toronto Scarborough, 1265 Military Trail, Toronto, ON, M1C 1A4.

<sup>2</sup>Ontario Ministry of the Environment, Conservation and Parks, 125 Resources Road, Toronto, ON, M9P 3V6.

<sup>3</sup>Department of Biological Sciences, University of Toronto Scarborough, 1265 Military Trail, Toronto, ON, M1C 1A4.

<sup>a</sup>These authors contributed equally to this work.

\*Corresponding author: Tel. (416) 287-7234, Fax: (416) 287-7279, E-mail address:

myrna.simpson@utoronto.ca

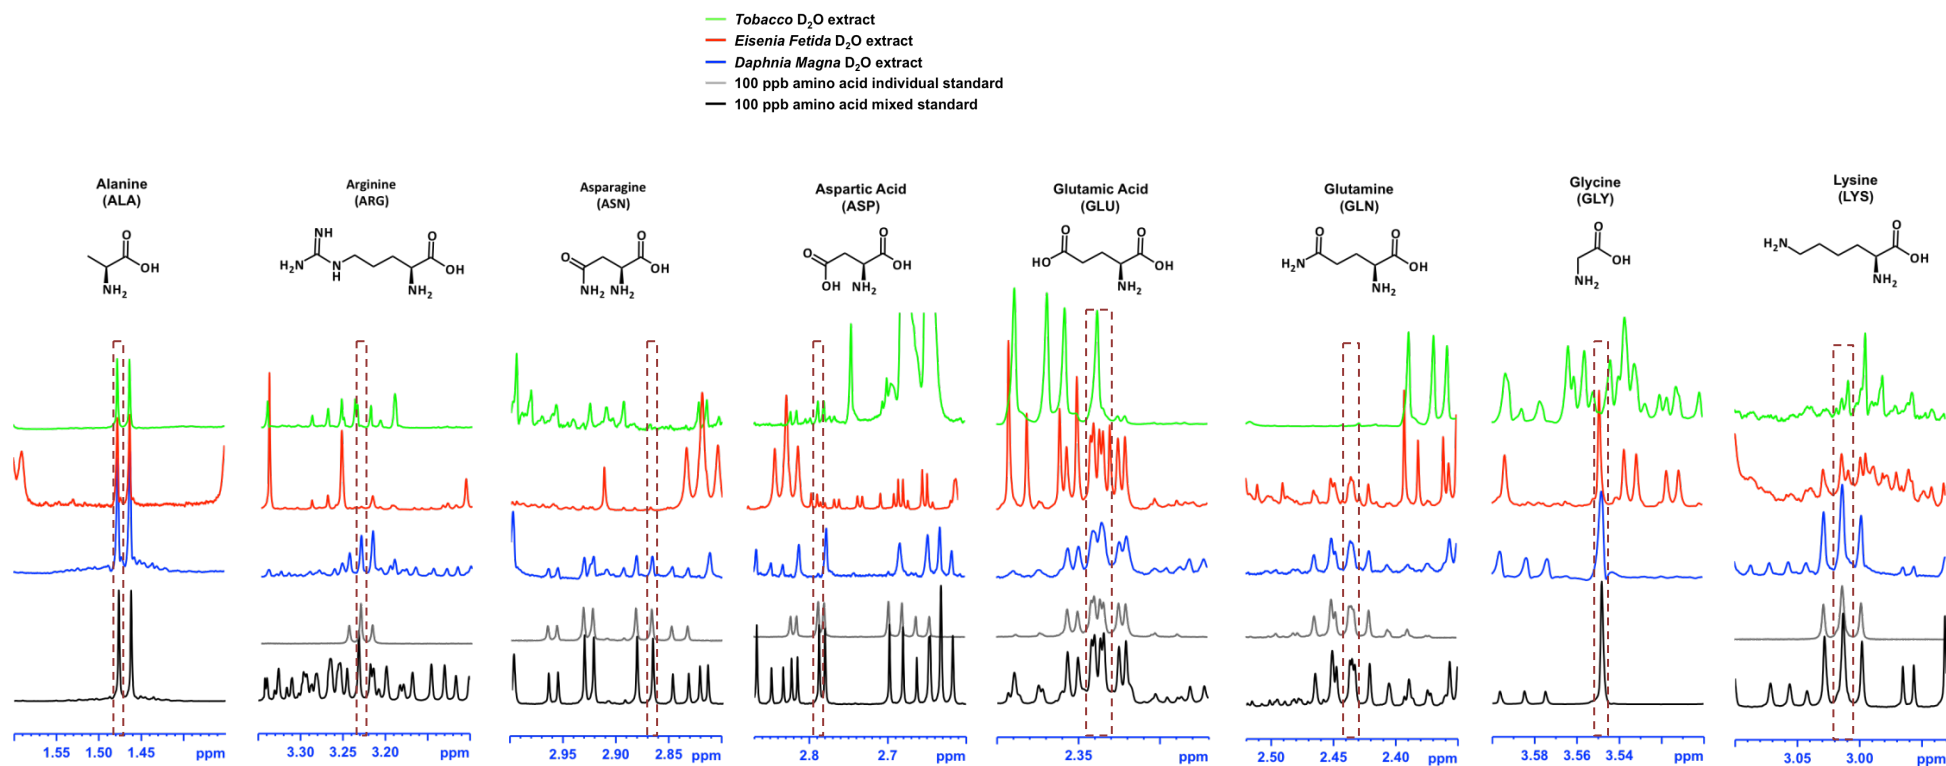

**Figure S1:** Comparison of the  $^1\text{H}$  NMR spectra of amino acid standards and of the tissue extracts of *Daphnia magna*, the earthworm *Eisenia fetida*, and the tobacco species *Nicotiana tabacum*. Resonances used for quantification are highlighted by a dashed box and also listed in Table S1.

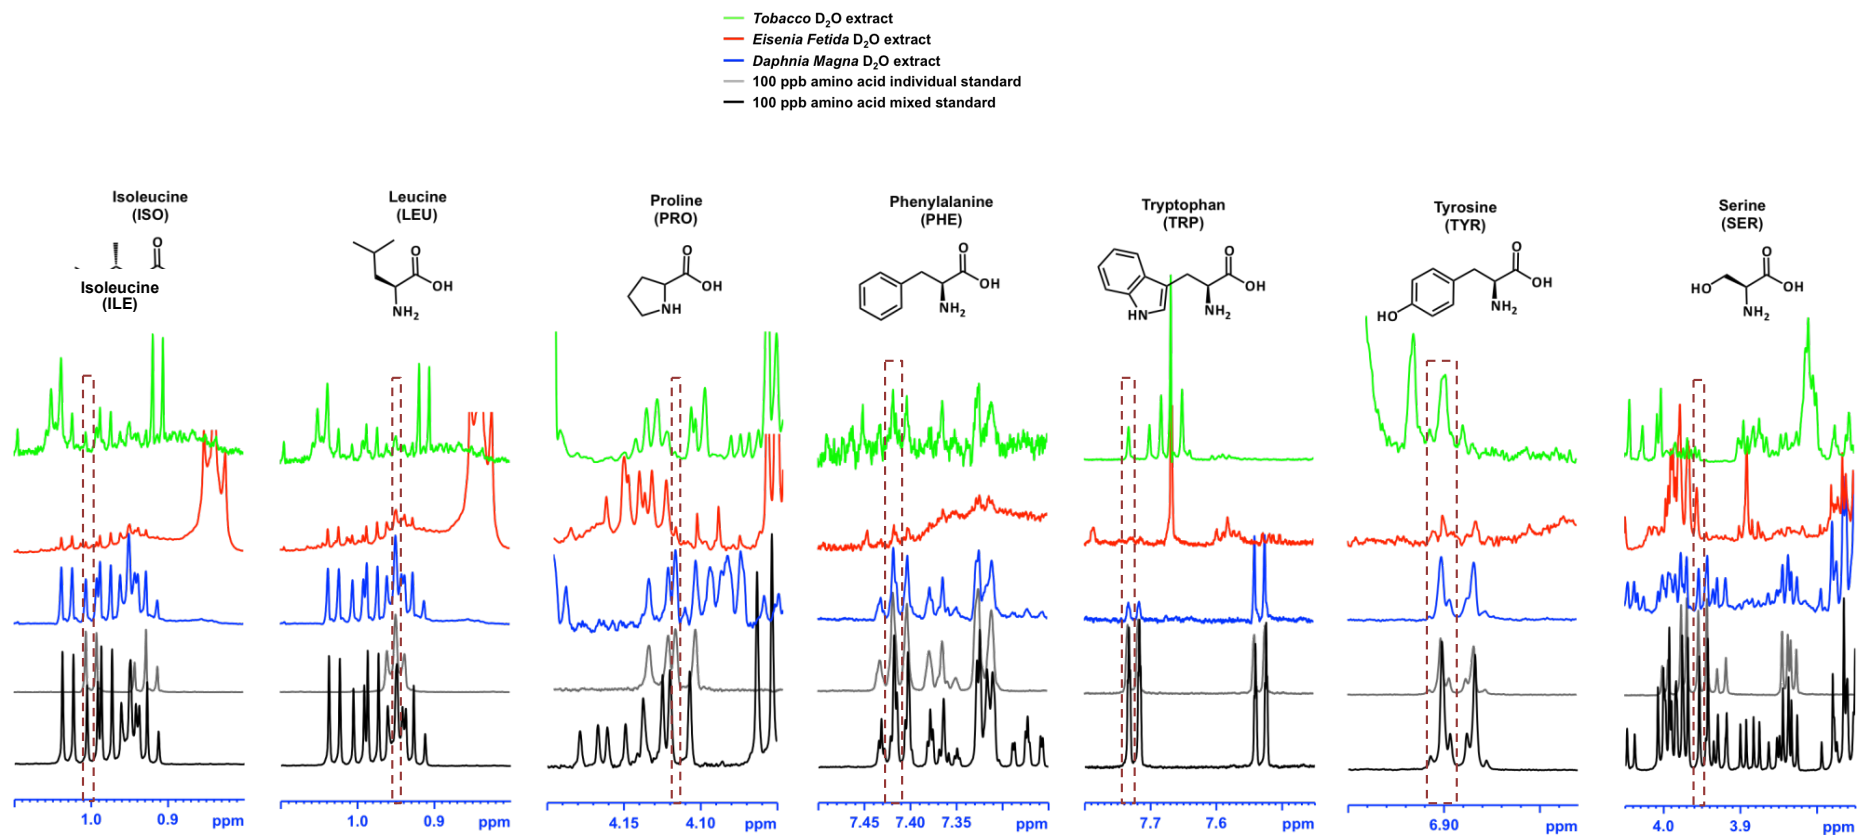

**Figure S1 (continued):** Comparison of the  $^1\text{H}$  NMR spectra of amino acid standards and of the tissue extracts of *Daphnia magna*, the earthworm *Eisenia fetida*, and the tobacco species *Nicotiana tabacum*. Resonances used for quantification are highlighted by a dashed box and also listed in Table S1.

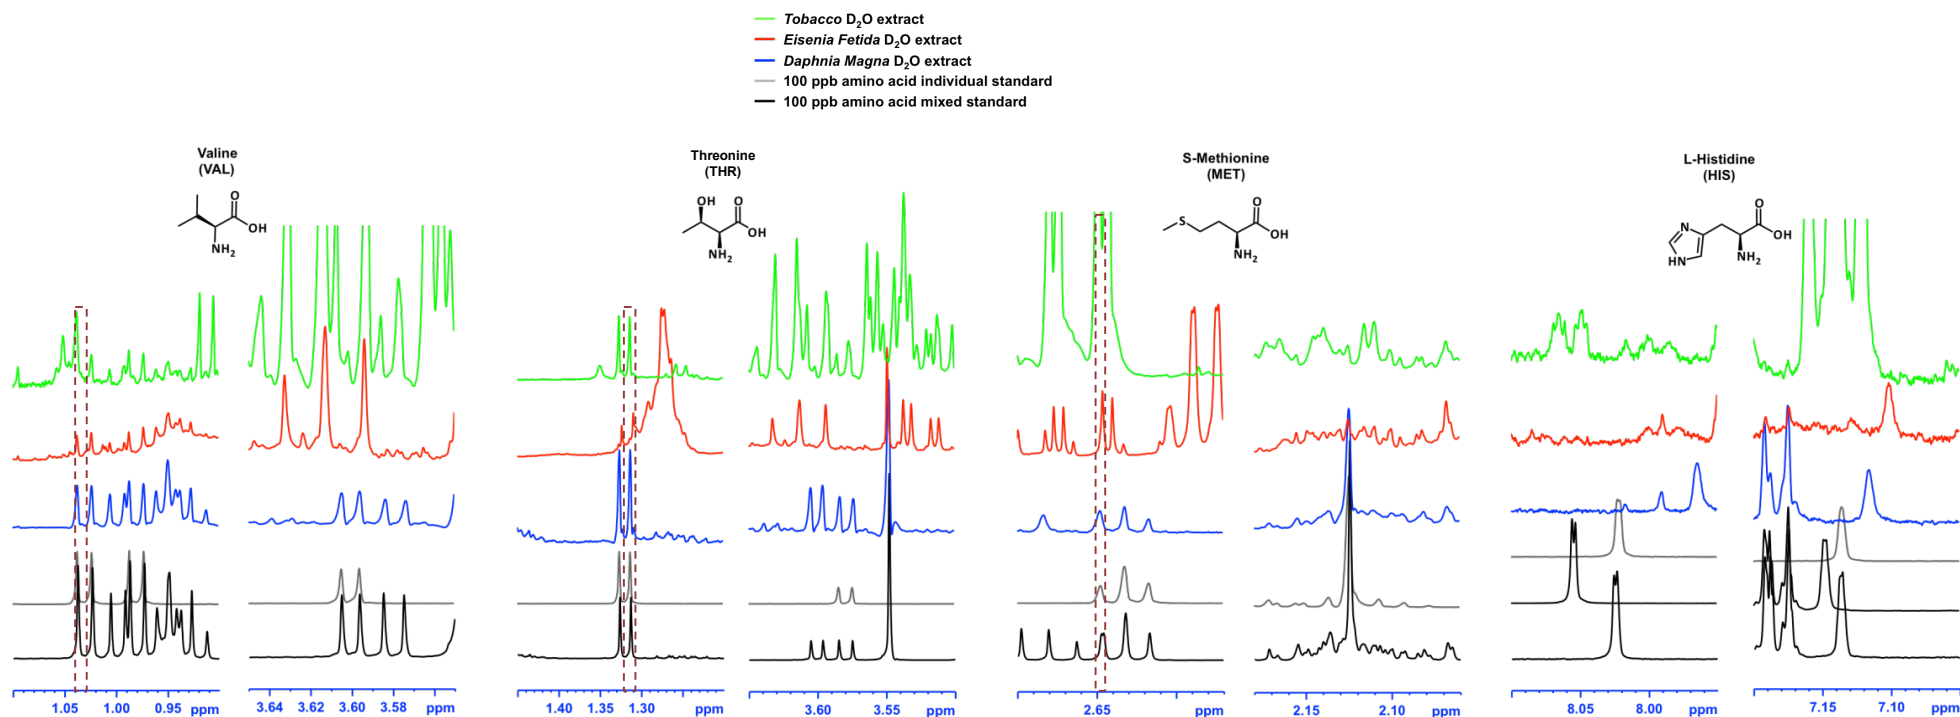

**Figure S1 (continued):** Comparison of the <sup>1</sup>H NMR spectra of amino acid standards and of the tissue extracts of *Daphnia magna*, the earthworm *Eisenia fetida*, and the tobacco species *Nicotiana tabacum*. Resonances used for quantification are highlighted by a dashed box and also listed in Table S1.

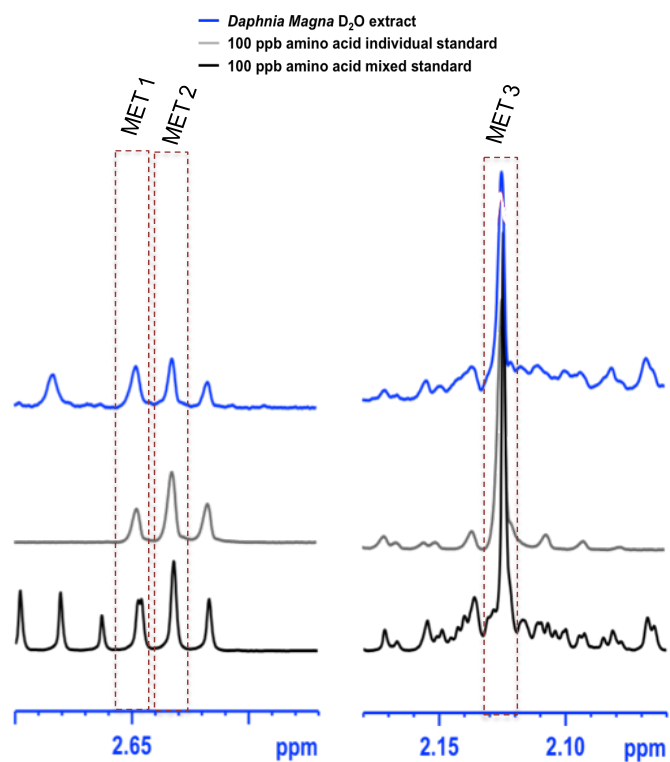

**Figure S2:**  $^1\text{H}$  NMR spectra of a *D. magna* extract, a 100  $\mu\text{g/L}$  individual methionine standard solution in  $\text{D}_2\text{O}$  buffer and a mixture of amino acids (100  $\mu\text{g/L}$ ) in  $\text{D}_2\text{O}$  buffer, highlighting the section highlighting the resonances that are attributed to methionine.

**Table S1:** The  $^1\text{H}$  NMR regions used for quantification of amino acids. Resonances are based on metabolic profiling using both  $^1\text{H}$  and two-dimensional NMR spectroscopy for *D. magna* extracts [1].

| Amino Acid    | Chemical Shift Range (ppm) |                 |
|---------------|----------------------------|-----------------|
|               | Left                       | Right           |
| Alanine       | 1.482                      | 1.4684          |
| Arginine      | 3.2388                     | 3.225           |
| Aspartate     | 2.7941                     | 2.784           |
| Asparagine    | 2.8739                     | 2.86            |
| Glutamate     | 2.3466                     | 2.3297          |
| Glutamine     | 2.4429                     | 2.4276          |
| Glycine       | 3.5538                     | 3.5443          |
| Histidine     | nd <sup>a</sup>            | nd <sup>a</sup> |
| Isoleucine    | 1.0094                     | 1.0023          |
| Leucine       | 0.9551                     | 0.9449          |
| Lysine        | 3.0216                     | 3.0048          |
| Methionine    | 2.6514                     | 2.6432          |
| Phenylalanine | 7.4252                     | 7.4102          |
| Proline       | 4.1227                     | 4.1173          |
| Serine        | 3.9564                     | 3.9493          |
| Threonine     | 1.3173                     | 1.3102          |
| Tryptophan    | 7.7414                     | 7.255           |
| Tyrosine      | 6.9118                     | 6.8912          |
| Valine        | 1.0432                     | 1.0338          |

<sup>a</sup>nd = not detected (HIS was not detected in *Daphnia magna* extracts via  $^1\text{H}$  NMR analysis; please see Results & Discussion section for more detail).

**Table S2:** LC-MS/MS multiple reaction monitoring (MRM) mass transitions and relative standard deviation (%) of triplicate injections of amino acid standards.

| Amino Acid Standard | MRM<br>Precursor ion ><br>product ion ( <i>m/z</i> ) | tr (min) | Triplicate Injection Relative<br>Standard Deviation (%) |
|---------------------|------------------------------------------------------|----------|---------------------------------------------------------|
| Alanine             | 89.9 > 44                                            | 2.2      | 5.0                                                     |
| Arginine            | 175 > 70.1<br>175 > 116.1                            | 1.9      | 5.6                                                     |
| Aspartate           | 133 > 87                                             | 2.1      | 3.5                                                     |
| Asparagine          | 134 > 74                                             | 2.1      | 4.9                                                     |
| Glutamate           | 148 > 84.1<br>148.1 > 130                            | 2.2      | 4.9                                                     |
| Glutamine           | 147.1 > 130.1<br>147.1 > 101.1                       | 2.2      | 4.8                                                     |
| Glycine             | 76 > 30                                              | 2.0      | 13                                                      |
| Histidine           | 156.1 > 110<br>156.1 > 83                            | 1.9      | 4.0                                                     |
| Isoleucine          | 132 > 69.1<br>132 > 86.1                             | 4.4      | 3.2                                                     |
| Leucine             | 132 > 86.1                                           | 4.5      | 3.2                                                     |
| Lysine              | 147 > 84.1<br>147 > 130.1                            | 1.8      | 3.6                                                     |
| Methionine          | 150 > 104<br>150 > 133                               | 3.7      | 2.9                                                     |
| Phenylalanine       | 166.1 > 120<br>166.1 > 149.1                         | 5.5      | 2.7                                                     |
| Proline             | 116 > 70.1                                           | 2.75     | 2.9                                                     |
| Serine              | 106 > 60                                             | 2.1      | 4.9                                                     |
| Threonine           | 120 > 74.1<br>120 > 56.2                             | 2.2      | 3.7                                                     |
| Tryptophan          | 205.1 > 188.1<br>205.1 > 146.1                       | 6.2      | 2.3                                                     |
| Tyrosine            | 182 > 136.2<br>182 > 165.1                           | 4.4      | 2.3                                                     |
| Valine              | 118.1 > 72.1<br>118.1 > 55                           | 3.2      | 4.4                                                     |

**Table S3:** Comparison of amino acid concentrations measured using LC-MS/MS and <sup>1</sup>H NMR spectroscopy on *Daphnia magna* D<sub>2</sub>O buffer extracts. Values are based on external standard quantification and expressed as averages (n=8) with associated standard errors.

| Amino acid    | LC-MS/MS (μM)         | NMR (μM)              | Difference in measurement between NMR and MS (μM) |
|---------------|-----------------------|-----------------------|---------------------------------------------------|
| Alanine       | 350 ± 60              | 430 ± 40              | 80                                                |
| Arginine      | 430 ± 40              | 450 ± 40              | 20                                                |
| Aspartate     | 67 ± 3                | 98 ± 8                | 31                                                |
| Asparagine    | 150 ± 20              | 260 ± 20              | 110                                               |
| Glutamate     | 230 ± 20              | 320 ± 30              | 90                                                |
| Glutamine     | 240 ± 20              | 230 ± 20              | -10                                               |
| Glycine       | 34 ± 4 <sup>a</sup>   | 240 ± 30 <sup>a</sup> | 206                                               |
| Histidine     | 58 ± 7                | nd <sup>b</sup>       | na <sup>c</sup>                                   |
| Isoleucine    | 340 ± 30              | 440 ± 40              | 100                                               |
| Leucine       | 390 ± 40              | 510 ± 50              | 120                                               |
| Lysine        | 330 ± 30              | 550 ± 50              | 220                                               |
| Methionine    | 140 ± 10              | 170 ± 20              | 30                                                |
| Phenylalanine | 130 ± 10              | 140 ± 10              | 10                                                |
| Proline       | 290 ± 40 <sup>d</sup> | 720 ± 60 <sup>d</sup> | 430                                               |
| Serine        | 200±20                | 330 ± 30              | 130                                               |
| Threonine     | 250 ± 20              | 320 ± 30              | 70                                                |
| Tryptophan    | 41 ± 4                | 44 ± 4                | 3                                                 |
| Tyrosine      | 220 ± 20              | 230 ± 20              | 10                                                |
| Valine        | 390 ± 40              | 410 ± 40              | 20                                                |

<sup>a</sup> Glycine quantification is likely underestimated by LC-MS/MS (see Results & Discussion section for more detail).

<sup>b</sup>nd = not detected in *Daphnia magna* extracts by <sup>1</sup>H NMR.

<sup>c</sup>na = not applicable because HIS was not quantified by NMR (see Results & Discussion section for more detail).

<sup>d</sup>Proline quantification was likely hindered due to the sample matrix (see Results & Discussion section for more detail).



## References

1. Nagato, E.G.; Lankadurai, B.P.; Soong, R.; Simpson, A.J.; Simpson, M.J. Development of an NMR Microprobe Procedure for High-Throughput Environmental Metabolomics of *Daphnia magna*. *Magn. Reson. Chem.* **2015**, *53*, 745–753, doi:10.1002/mrc.4236.
